# Supplementary material for: Pathogenicity of Asymptomatically Residing Fusarium Species in Non-Gramineous Plants and Weeds to Spring Wheat under Greenhouse Conditions
Source: MDPI journal article supplement (doi:10.3390/pathogens11121467), 2022-12-04
Supplement: s1 [file s1]

## Supplementary Materials

**Table S1.** Treatments in Experiment I for assessing the pathogenicity of *Fusarium* spp. derived from non-gramineous plants to spring wheat under greenhouse conditions.

| Code      | <i>Fusarium</i> species    | Hostplant (Latin name)                        | Plant tissue |
|-----------|----------------------------|-----------------------------------------------|--------------|
| BN42s     | <i>F. avenaceum</i>        | Spring oilseed rape ( <i>Brassica napus</i> ) | Stem         |
| BN19c     | <i>F. avenaceum</i>        | Spring oilseed rape ( <i>Brassica napus</i> ) | Crown        |
| N49fl     | <i>F. avenaceum</i>        | Spring oilseed rape ( <i>Brassica napus</i> ) | Flower       |
| PS3r      | <i>F. avenaceum</i>        | Field pea ( <i>Pisum sativum</i> )            | Root         |
| PS10fl    | <i>F. avenaceum</i>        | Field pea ( <i>Pisum sativum</i> )            | Flower       |
| PS27l     | <i>F. avenaceum</i>        | Field pea ( <i>Pisum sativum</i> )            | Leave        |
| BV32.2l   | <i>F. avenaceum</i>        | Sugar beet ( <i>Beta vulgaris</i> )           | Leave        |
| BV33.3s   | <i>F. avenaceum</i>        | Sugar beet ( <i>Beta vulgaris</i> )           | Stem         |
| BV21.2l   | <i>F. avenaceum</i>        | Sugar beet ( <i>Beta vulgaris</i> )           | Leave        |
| 8SW4SP6   | <i>F. avenaceum</i>        | Spring wheat ( <i>Triticum aestivum</i> )     | Head         |
| 8SW2SP7   | <i>F. avenaceum</i>        | Spring wheat ( <i>Triticum aestivum</i> )     | Head         |
| 8SW4SP8   | <i>F. avenaceum</i>        | Spring wheat ( <i>Triticum aestivum</i> )     | Head         |
| 7BN2l5    | <i>F. culmorum</i>         | Winter oilseed rape ( <i>Brassica napus</i> ) | Leave        |
| BN26r     | <i>F. culmorum</i>         | Spring oilseed rape ( <i>Brassica napus</i> ) | Root         |
| BN39fl    | <i>F. culmorum</i>         | Spring oilseed rape ( <i>Brassica napus</i> ) | Flower       |
| PS38r     | <i>F. culmorum</i>         | Field pea ( <i>Pisum sativum</i> )            | Root         |
| PS333.r   | <i>F. culmorum</i>         | Field pea ( <i>Pisum sativum</i> )            | Root         |
| PS23r     | <i>F. culmorum</i>         | Field pea ( <i>Pisum sativum</i> )            | Root         |
| BV16l.1pe | <i>F. culmorum</i>         | sugar beet ( <i>Beta vulgaris</i> )           | Petiole      |
| BV15.1l   | <i>F. culmorum</i>         | sugar beet ( <i>Beta vulgaris</i> )           | Leave        |
| BV142.1pe | <i>F. culmorum</i>         | Sugar beet ( <i>Beta vulgaris</i> )           | Petiole      |
| 8SW4SP11  | <i>F. culmorum</i>         | Spring wheat ( <i>Triticum aestivum</i> )     | Head         |
| 8SW5SP2   | <i>F. culmorum</i>         | Spring wheat ( <i>Triticum aestivum</i> )     | Head         |
| 8SW1SP3   | <i>F. culmorum</i>         | Spring wheat ( <i>Triticum aestivum</i> )     | Head         |
| 7BN2l1    | <i>F. graminearum</i>      | Winter oilseed rape ( <i>Brassica napus</i> ) | Leave        |
| BN98c     | <i>F. graminearum</i>      | Winter oilseed rape ( <i>Brassica napus</i> ) | Crown        |
| BN425l    | <i>F. graminearum</i>      | Spring oilseed rape ( <i>Brassica napus</i> ) | Leave        |
| PS21.2l   | <i>F. graminearum</i>      | Field pea ( <i>Pisum sativum</i> )            | Leave        |
| 5PS1s2    | <i>F. graminearum</i>      | Field pea ( <i>Pisum sativum</i> )            | Stem         |
| 5PS3p3-1  | <i>F. graminearum</i>      | Field pea ( <i>Pisum sativum</i> )            | Pod          |
| BV7L6     | <i>F. graminearum</i>      | Sugar beet ( <i>Beta vulgaris</i> )           | Leave        |
| BV463.1l  | <i>F. graminearum</i>      | Sugar beet ( <i>Beta vulgaris</i> )           | Leave        |
| BV7L13    | <i>F. graminearum</i>      | Sugar beet ( <i>Beta vulgaris</i> )           | Leave        |
| 6SW4SP1   | <i>F. graminearum</i>      | Spring wheat ( <i>Triticum aestivum</i> )     | Head         |
| 6SW5SP1   | <i>F. graminearum</i>      | Spring wheat ( <i>Triticum aestivum</i> )     | Head         |
| 6SW5SP19  | <i>F. graminearum</i>      | Spring wheat ( <i>Triticum aestivum</i> )     | Head         |
| BN9fl1    | <i>F. sporotrichioides</i> | Spring oilseed rape ( <i>Brassica napus</i> ) | Flower       |
| BN11l     | <i>F. sporotrichioides</i> | Spring oilseed rape ( <i>Brassica napus</i> ) | Leave        |
| BN33r2    | <i>F. sporotrichioides</i> | Spring oilseed rape ( <i>Brassica napus</i> ) | Root         |
| PS12p     | <i>F. sporotrichioides</i> | Field pea ( <i>Pisum sativum</i> )            | Pod          |
| PS14fl    | <i>F. sporotrichioides</i> | Field pea ( <i>Pisum sativum</i> )            | Flower       |
| PS37s     | <i>F. sporotrichioides</i> | Field pea ( <i>Pisum sativum</i> )            | Stem         |

|                         |                            |                                           |      |
|-------------------------|----------------------------|-------------------------------------------|------|
| BV33.2s                 | <i>F. sporotrichioides</i> | Sugar beet ( <i>Beta vulgaris</i> )       | Stem |
| BV50.1s                 | <i>F. sporotrichioides</i> | Sugar beet ( <i>Beta vulgaris</i> )       | Stem |
| 9SWSP17                 | <i>F. sporotrichioides</i> | Spring wheat ( <i>Triticum aestivum</i> ) | Head |
| 8SW5SP19                | <i>F. sporotrichioides</i> | Spring wheat ( <i>Triticum aestivum</i> ) | Head |
| Control (sterile water) |                            |                                           |      |

**Table S2.** Treatments in Experiment II for assessing the pathogenicity of *Fusarium* spp. isolated from weeds to spring wheat under greenhouse conditions.

| Code      | <i>Fusarium</i> species | Hostplant (Latin name)                                 | Plant tissue |
|-----------|-------------------------|--------------------------------------------------------|--------------|
| TI118c    | <i>F. avenaceum</i>     | Scentless Mayweed ( <i>Tripleurospermum inodorum</i> ) | Crown        |
| TI1143s   | <i>F. avenaceum</i>     | Scentless Mayweed ( <i>Tripleurospermum inodorum</i> ) | Stem         |
| VA1109s   | <i>F. avenaceum</i>     | European field pansy ( <i>Viola arvensis</i> )         | Stem         |
| VA1110f   | <i>F. avenaceum</i>     | European field pansy ( <i>Viola arvensis</i> )         | Fruit        |
| CBP1101fl | <i>F. avenaceum</i>     | Shepherd's purse ( <i>Capsella bursa-pastoris</i> )    | Flower       |
| CBP1149c  | <i>F. avenaceum</i>     | Shepherd's purse ( <i>Capsella bursa-pastoris</i> )    | Crown        |
| PA1126s   | <i>F. avenaceum</i>     | Annual meadow grass ( <i>Poa annua</i> )               | Stem         |
| PA1128f   | <i>F. avenaceum</i>     | Annual meadow grass ( <i>Poa annua</i> )               | Fruit        |
| FC1178fl  | <i>F. avenaceum</i>     | Black bindweed ( <i>Fallopia convolvulus</i> )         | Flower       |
| FC1180l   | <i>F. avenaceum</i>     | Black bindweed ( <i>Fallopia convolvulus</i> )         | Leave        |
| 8SWG1SP7  | <i>F. avenaceum</i>     | Spring wheat ( <i>Triticum aestivum</i> )              | Head         |
| 8SW4SP10  | <i>F. avenaceum</i>     | Spring wheat ( <i>Triticum aestivum</i> )              | Head         |
| TI1115c   | <i>F. culmorum</i>      | Scentless Mayweed ( <i>Tripleurospermum inodorum</i> ) | Crown        |
| TI1330r2  | <i>F. culmorum</i>      | Scentless Mayweed ( <i>Tripleurospermum inodorum</i> ) | Root         |
| VA1105l   | <i>F. culmorum</i>      | European field pansy ( <i>Viola arvensis</i> )         | Leave        |
| VA1164f   | <i>F. culmorum</i>      | European field pansy ( <i>Viola arvensis</i> )         | Fruit        |
| CBP1147c  | <i>F. culmorum</i>      | Shepherd's purse ( <i>Capsella bursa-pastoris</i> )    | Crown        |
| CBP1401r  | <i>F. culmorum</i>      | Shepherd's purse ( <i>Capsella bursa-pastoris</i> )    | Root         |
| PA1129c   | <i>F. culmorum</i>      | Annual meadow grass ( <i>Poa annua</i> )               | Crown        |
| PA1129f   | <i>F. culmorum</i>      | Annual meadow grass ( <i>Poa annua</i> )               | Fruit        |
| FC1088r   | <i>F. culmorum</i>      | Black bindweed ( <i>Fallopia convolvulus</i> )         | Root         |
| FC1180c   | <i>F. culmorum</i>      | Black bindweed ( <i>Fallopia convolvulus</i> )         | Crown        |
| 8SWG5SP4  | <i>F. culmorum</i>      | Spring wheat ( <i>Triticum aestivum</i> )              | Head         |
| 8SWG1SP25 | <i>F. culmorum</i>      | Spring wheat ( <i>Triticum aestivum</i> )              | Head         |
| TI1120c   | <i>F. graminearum</i>   | Scentless Mayweed ( <i>Tripleurospermum inodorum</i> ) | Crown        |
| TI1265f   | <i>F. graminearum</i>   | Scentless Mayweed ( <i>Tripleurospermum inodorum</i> ) | Fruit        |
| VA153l    | <i>F. graminearum</i>   | European field pansy ( <i>Viola arvensis</i> )         | Leave        |
| VA541s    | <i>F. graminearum</i>   | European field pansy ( <i>Viola arvensis</i> )         | Stem         |
| CBP1151f  | <i>F. graminearum</i>   | Shepherd's purse ( <i>Capsella bursa-pastoris</i> )    | Fruit        |
| CBP1400l  | <i>F. graminearum</i>   | Shepherd's purse ( <i>Capsella bursa-pastoris</i> )    | Leave        |
| PA1130c   | <i>F. graminearum</i>   | Annual meadow grass ( <i>Poa annua</i> )               | Crown        |
| PA1350s   | <i>F. graminearum</i>   | Annual meadow grass ( <i>Poa annua</i> )               | Stem         |
| FC144r    | <i>F. graminearum</i>   | Black bindweed ( <i>Fallopia convolvulus</i> )         | Root         |
| FC544r    | <i>F. graminearum</i>   | Black bindweed ( <i>Fallopia convolvulus</i> )         | Root         |

|                         |                            |                                                        |       |
|-------------------------|----------------------------|--------------------------------------------------------|-------|
| 6SW4SP1                 | <i>F. graminearum</i>      | Spring wheat ( <i>Triticum aestivum</i> )              | Head  |
| 6SW5SP1                 | <i>F. graminearum</i>      | Spring wheat ( <i>Triticum aestivum</i> )              | Head  |
| TI1123s                 | <i>F. sporotrichioides</i> | Scentless Mayweed ( <i>Tripleurospermum inodorum</i> ) | Stem  |
| TI1135l                 | <i>F. sporotrichioides</i> | Scentless Mayweed ( <i>Tripleurospermum inodorum</i> ) | Leave |
| VA1107f                 | <i>F. sporotrichioides</i> | European field pansy ( <i>Viola arvensis</i> )         | Fruit |
| VA1159f                 | <i>F. sporotrichioides</i> | European field pansy ( <i>Viola arvensis</i> )         | Fruit |
| CBP1101f                | <i>F. sporotrichioides</i> | Shepherd's purse ( <i>Capsella bursa-pastoris</i> )    | Fruit |
| CBP1148f                | <i>F. sporotrichioides</i> | Shepherd's purse ( <i>Capsella bursa-pastoris</i> )    | Fruit |
| FC1089c                 | <i>F. sporotrichioides</i> | Black bindweed ( <i>Fallopia convolvulus</i> )         | Crown |
| 8SW5SP19                | <i>F. sporotrichioides</i> | Spring wheat ( <i>Triticum aestivum</i> )              | Head  |
| 9SWSP17                 | <i>F. sporotrichioides</i> | Spring wheat ( <i>Triticum aestivum</i> )              | Head  |
| Control (sterile water) |                            |                                                        |       |
